# Supplementary material for: Ag nanoparticle sheet as a marker of lateral remote photocatalytic reactions
Source: Royal Society of Chemistry journal article supplement (doi:10.1039/b9nr00240e), 2009-11-17
Supplement: b9nr00240e.pdf [file b9nr00240e.pdf]

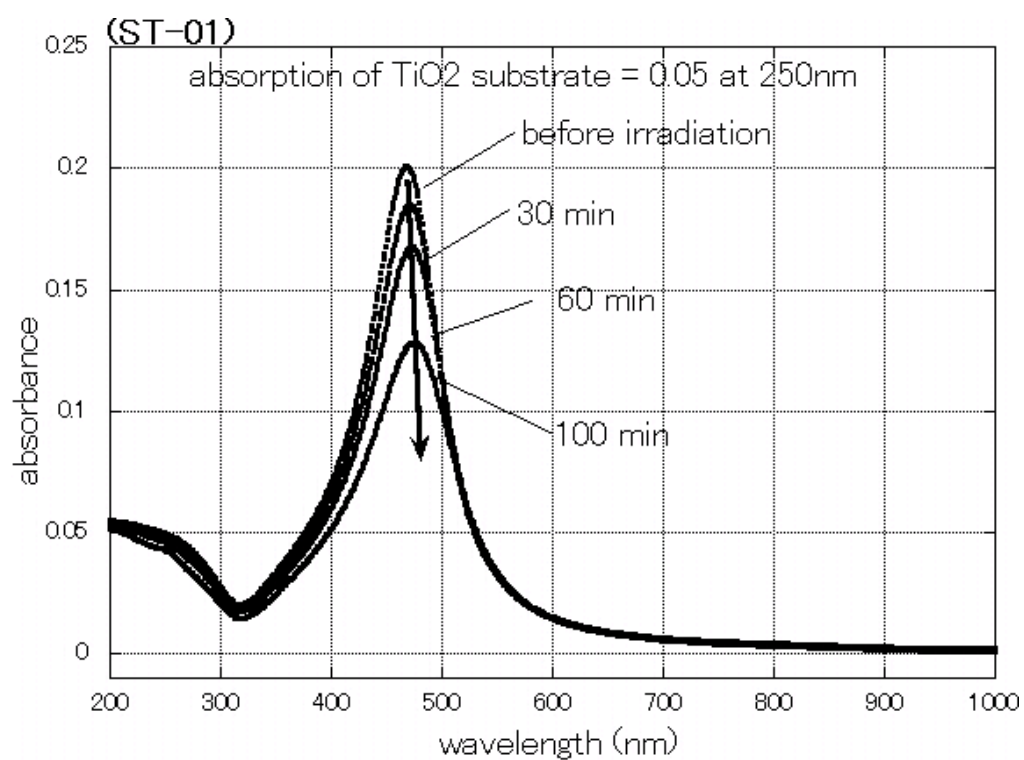

Suppl.\_1 Spectrum change of Ag nanosheet deposited on ST-01TiO<sub>2</sub> particles  
(1min adsorption) by UV irradiation.

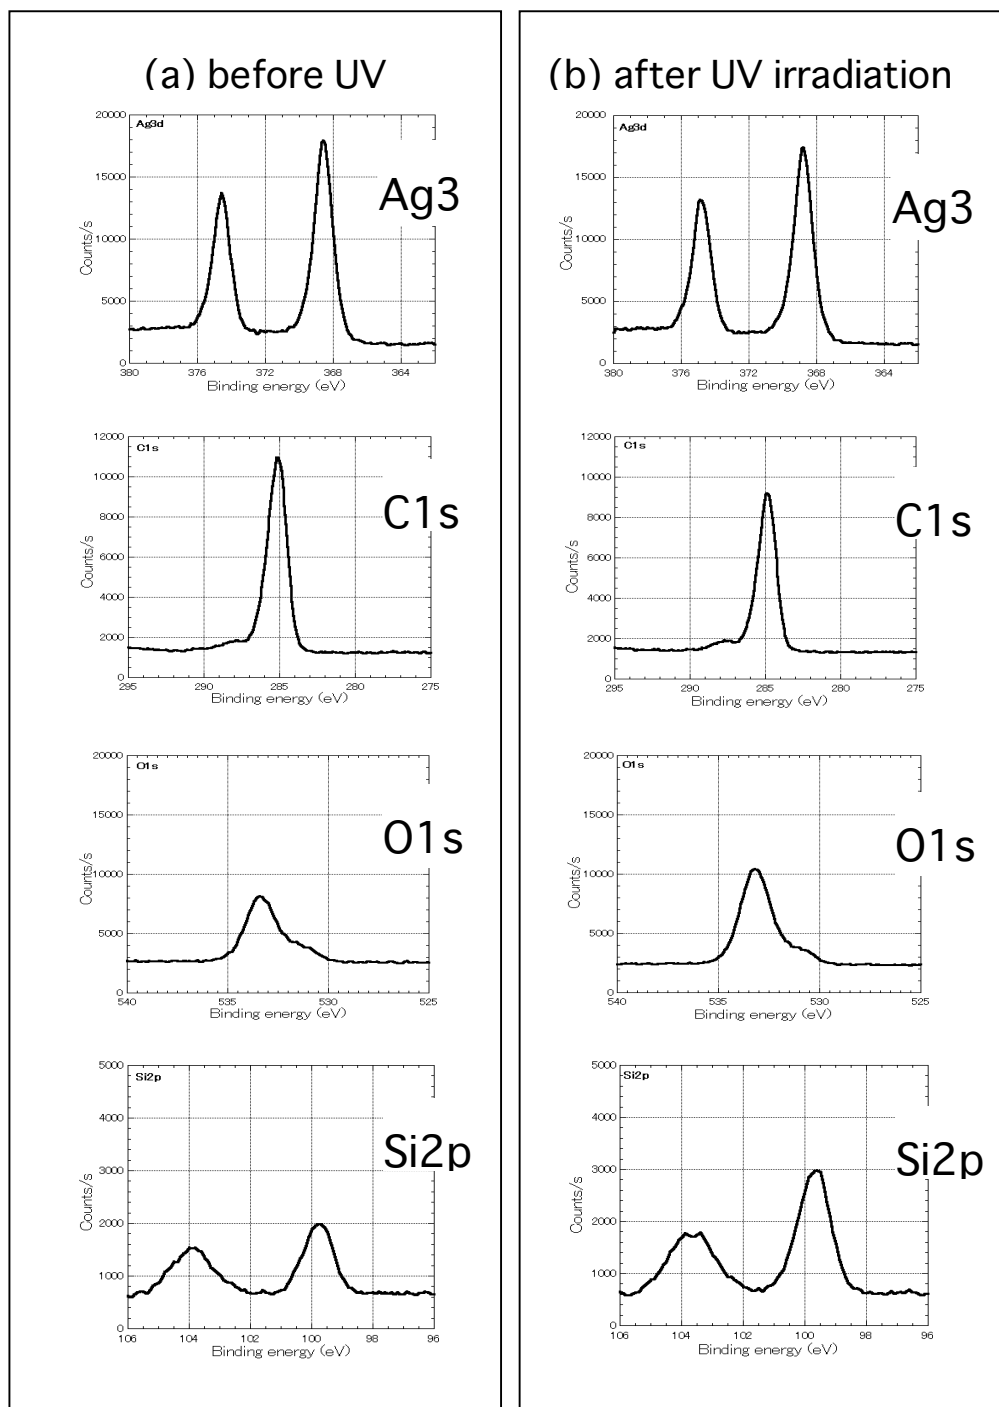

#### Supporting material for Fig.8

XPS signals of Ag nanosheet deposited on naturally oxidized Si(100) wafer (without  $\text{TiO}_2$ ): (a) before UV irradiation, (b) after UV irradiation.
